# Target of selective auditory attention can be robustly followed with MEG

Dovilė Kurmanavičiūtė<sup>a,\*</sup>, Antti Rantala<sup>a</sup>, Mainak Jas<sup>a,c</sup>, Anne Välilä<sup>a</sup>,  
Lauri Parkkonen<sup>a,b</sup>

<sup>a</sup>*Department of Neuroscience and Biomedical Engineering, Aalto University, P.O. Box 12200, FI-00076 Aalto, Finland*

<sup>b</sup>*Aalto NeuroImaging, Aalto University, FI-00076 Aalto, Finland*

<sup>c</sup>*CNRS LTCI, Télécom Paris Tech, Université Paris-Saclay, Paris, France*

---

## Abstract

Selective auditory attention enables filtering relevant from irrelevant acoustic information. Specific auditory responses, measurable by electro- and magnetoencephalography (EEG/MEG), are known to be modulated by attention to the evoking stimuli. However, these attention effects are typically demonstrated in averaged responses and their robustness in single trials is not studied extensively.

We applied decoding algorithms to MEG to investigate how well the target of auditory attention could be determined from single responses and which spatial and temporal aspects of the responses carry most of the information regarding the target of attention. To this end, we recorded brain responses of 15 healthy subjects with MEG when they selectively attended to one of the simultaneously presented auditory streams of words “Yes” and “No”. A support vector machine was trained on the MEG data both at the sensor and source level to predict at every trial which stream was attended.

Sensor-level decoding of the attended stream using the entire 2-s epoch resulted in a mean accuracy of  $93\% \pm 1\%$  (range 83–99% across subjects). Time-resolved decoding revealed that the highest accuracies were obtained 200–350 ms after the stimulus onset. Spatially-resolved source-level decoding indicated that the cortical sources most informative of the attended stream were located primarily in the auditory cortex, especially in the right hemisphere.

---

\*Corresponding author [dovile.kurmanaviciute@aalto.fi](mailto:dovile.kurmanaviciute@aalto.fi)

Our result corroborates attentional modulation of auditory evoked responses also to naturalistic stimuli. The achieved high decoding accuracy could enable the use of our experimental paradigm and classification method in a brain–computer interface.

*Keywords:* selective attention, single-trial analysis, magnetoencephalography, MEG, auditory system, dichotic listening

---

## 1 **1. Introduction**

2 Selective auditory attention is a cognitive function which enables filtering  
3 of relevant information from irrelevant. The need of such a selection mecha-  
4 nism has been illustrated by the cocktail party problem in which the listener  
5 has to concentrate his/her auditory attention to one speaker while suppress-  
6 ing the voices of the irrelevant speakers to follow that one speaker (Cherry,  
7 1953). Electroencephalographic measurements during dichotic listening have  
8 shown that selective auditory attention modulates brain responses generated  
9 in auditory cortex (Hillyard et al., 1973; Woldorff et al., 1993).

10 In the last decade, machine-learning methods have been applied to test  
11 whether the target of selective attention can be detected from electro- and  
12 magnetoencephalographic (EEG/MEG) data (Nijboer et al., 2008; Furdea  
13 et al., 2009; Halder et al., 2010, 2016; Schreuder et al., 2010; Hühne et al.,  
14 2011; Hill et al., 2012; Nambu et al., 2013; Hübner et al., 2018). EEG and  
15 MEG are well suited for monitoring attention effects as they provide a high  
16 temporal resolution in the order of milliseconds, enabling the detection and  
17 classification of evoked responses (e.g. auditory or visual P300; McCane  
18 et al., 2015; Yeom et al., 2014; Curtin et al., 2012), steady-state responses  
19 (e.g. SSRs or mixed SSR/P300; Kaongoen and Jo, 2017; Kim et al., 2011)  
20 and oscillatory brain activity (e.g. sensory-motor rhythm (SMR); Geronimo  
21 et al.).

22 The ability to detect the target of auditory attention from brain signals  
23 has been exploited to improve the performance of hearing aids (Kidd, 2017) as  
24 well as in brain-computer interfaces (BCI) e.g. to re-enable communication  
25 in paralyzed patients (Sellers and Donchin, 2006; Astrand et al., 2014; Mc-  
26 Cane et al., 2015). However, attentional effects are not equally easy to detect  
27 from all response types. Hill and colleagues (2012) argue that attention-based  
28 classification on ERPs is more reliable than that on steady-state evoked po-  
29 tentials (SSEPs) in a dichotic listening task due to the limited attentional  
30 modulation of auditory SSEPs.

31 Many BCI approaches employ a secondary mental task artificially con-  
32 nected to the primary task because of the poor signal-to-noise ratio of the  
33 responses related to it; for example, a primary task of communicating a “yes”  
34 or “no” answer could be linked to a secondary task of imagining moving the  
35 right or left hand, respectively. Here, we will test the use of spoken-word  
36 stimuli in BCI that only comprises the primary task and thus requires mini-  
37 mal training of the subjects.

## 38 2. Materials and methods

### 39 2.1. Participants

40 Fifteen healthy adult volunteers (4 females, 11 males; mean age  $28.8 \pm 3.8$   
41 years, range 23–38 years) participated in our study. Two subjects were left-  
42 handed and the rest right-handed. Participants did not report hearing prob-  
43 lems or history of psychiatric disorders. The study was approved by the Aalto  
44 University Ethics Committee. All participants gave their informed consent  
45 prior to the recordings.

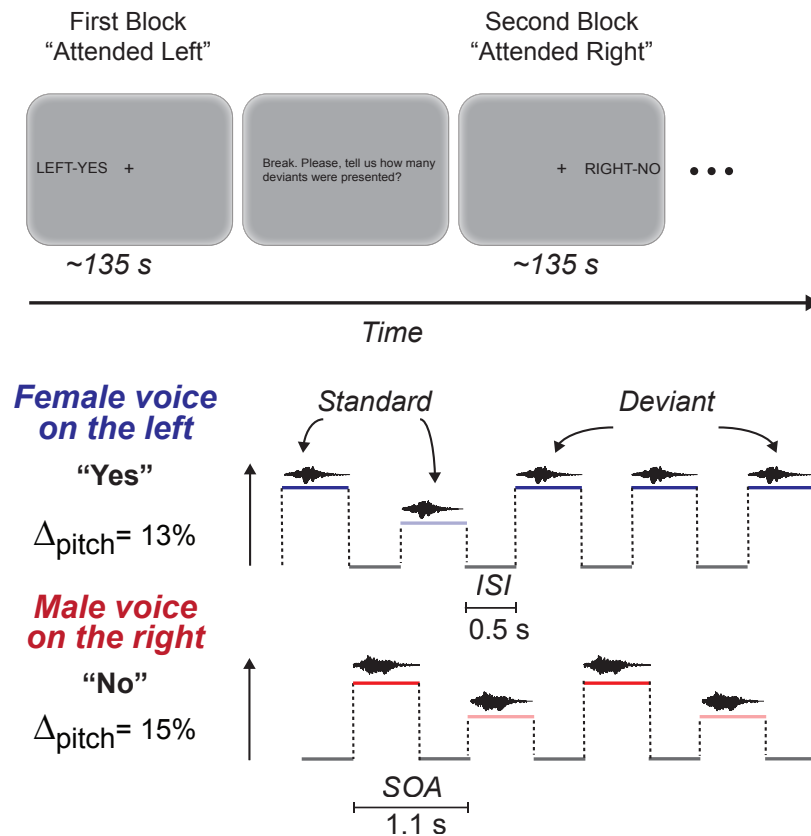

Figure 1: Experimental design. **Top:** Block structure and the instructions to the subject. **Bottom:** Stimulus sequence within each block.



46 *2.2. Stimuli and experimental protocol*

47 The auditory stimulus comprised of two simultaneous word streams; the  
48 word “Yes” was repeatedly presented on the left side and the word “No” on  
49 the right; see Figure 1. In each word stream, high- and low-pitch versions  
50 of the same word stimuli alternated. To control for subjects’ attention, the  
51 sequence contained occasional deviants (violations of the regular alternation),  
52 which comprised three consecutive high-pitch versions of the same word.  
53 Deviant probability was 10% in both streams for the first seven subjects and  
54 5% for the rest subjects in order to reduce the mental load of memorizing  
55 the deviant count.

56 To create a realistic acoustic scene, the stimuli were recorded with a  
57 dummy head at the center of a room with dimensions comparable to those of  
58 the magnetically shielded room where the MEG recordings were performed.  
59 The speakers were standing at about 40 degrees to the left/right of the  
60 dummy head at a distance of 1.13 m.

61 The experiment comprised 8 blocks, each lasting about 5 min. Two sec-  
62 onds before a block started, the subject was instructed to direct his/her  
63 attention to one of the streams by the cues “LEFT-YES” or “RIGHT-NO”  
64 on the screen. The task of the subject was to focus on the indicated word  
65 stream, covertly count the deviants and maintain gaze at the fixation cross  
66 displayed on the screen. The experiment always started with the condition  
67 “Attended Left” and was followed by the condition “Attended Right”. The  
68 order of the remaining six blocks was randomized across subjects. The total  
69 length of the experiment was 50–60 minutes including the breaks between  
70 the blocks.

71 PsychoPy version 1.79.01 (Peirce, 2007, 2008) Python package was used  
72 for controlling and presenting the auditory stimuli and visual instructions.  
73 The stimulation was controlled by a computer running Windows 2003 for  
74 the first nine subjects and Linux Ubuntu 14.04 for the rest. Auditory stim-  
75 ulti were delivered by a professional audio card (E-MU 1616m PCIe, E-MU  
76 Systems, Scotts Valley, CA, USA), an audio power amplifier (LTO MACRO  
77 830, Sekaku Electron Industry Co., Ltd, Taichung, Taiwan), and custom-  
78 built loudspeaker units outside of the shielded room and plastic tubes con-  
79 veying the stimuli separately to the ears. Sound pressure was adjusted to a  
80 comfortable level for each subject individually.

### 81 *2.3. MEG data acquisition*

82 MEG measurements were performed with a whole-scalp 306-channel Elekta  
83 Neuromag VectorView MEG system (Elekta Oy/MEGIN, Helsinki, Finland)  
84 at the MEG Core of Aalto Neuroimaging, Aalto University. During acqui-  
85 sition, the data were filtered to 0.1–330 Hz and sampled at 1 kHz. Prior to  
86 the MEG recording, anatomical landmarks (nasion, left and right preauricu-  
87 lar points), head-position indicator coils, and additional scalp-surface points  
88 (around 100) were digitized using an Isotrak 3D digitizer (Polhemus Navi-  
89 gational Sciences, Colchester, VT, USA). Bipolar electrooculogram (EOG)  
90 with electrodes positioned around the right eye (laterally and below) was  
91 recorded. Fourteen of the 15 subjects were recorded with continuous head  
92 movement tracking. All subjects were measured in the seated position. The  
93 back-projection screen was 1 m from the eyes of the subject. If needed, vision  
94 was corrected by nonmagnetic goggles.

### 95 *2.4. Data pre-processing*

96 The MaxFilter software (version 2.2.10; Elekta Oy/MEGIN, Helsinki,  
97 Finland) was applied to suppress external interference using temporal signal  
98 space separation to compensate for head movements (Taulu and Hari, 2009).  
99 Further analysis was performed using MNE version 2.7.4 and MNE-Python  
100 (version 0.14; Gramfort et al., 2014) and ScikitLearn (version 0.18; Pedregosa  
101 et al., 2011) software packages.

102 Finite-impulse-response (FIR) filters were employed to filter the unaver-  
103 aged MEG data to 0.1–30 Hz for visualization of the evoked responses and  
104 for sensor- and source-level decoding. Ocular artifacts were suppressed by re-  
105 moving those independent components (1–4 per subject, on average 3) that  
106 correlated most with the EOG signal. 2-s long epochs with a 0.50-s pre-  
107 stimulus period were extracted from the data at every word stimulus. The  
108 delay in the sound reproduction system was considered in the epoch timing.  
109 Epochs were rejected if any of the gradiometer signals exceeded 4000 fT/cm.  
110 Responses to deviants were excluded from data analysis.

### 111 *2.5. Evoked responses*

#### 112 *2.5.1. Sensor-level analysis*

113 The trial counts were equalized across the conditions (“Attended Left”,  
114 “Attended Right”, “Unattended Left” and “Unattended Right”) and the tri-  
115 als were averaged. Only attended attention conditions were used in sensor-  
116 and source-level classification.

## 117 2.5.2. Source-level analysis

118 Head models were constructed based on individual magnetic resonance  
119 images (MRIs) when available ( $N = 12$ ) applying the watershed algorithm  
120 implemented in the FreeSurfer software (Version 5.3; Dale et al., 1999; Fischl  
121 et al., 1999). Using the MNE software, single-compartment boundary ele-  
122 ment models (BEM) comprising 5120 triangles were then created based on  
123 the inner skull surface. The MRIs of three subjects were not available and  
124 these subjects were excluded from the source-level analysis.

125 For the source space, the cortical mantle was segmented from MRIs using  
126 FreeSurfer and the resulting triangle mesh was subdivided to 4098 sources  
127 per hemisphere. The dynamic statistical parametric mapping (dSPM; Dale  
128 et al., 2000) variant of minimum-norm estimation was applied to model the  
129 activity at these sources. The noise covariance used in the model was esti-  
130 mated for each subject from all epochs' 0.50-s pre-stimulus intervals. dSPM  
131 sources "Attended Left" and "Attended Right" attention conditions were es-  
132 timated for all subjects individually. The obtained source amplitudes were  
133 then normalized for each subject and a group-level dSPM source estimate was  
134 calculated by morphing the normalized individual estimates to the FreeSurfer  
135 average brain and averaging them. For the group averages individual dSPMs  
136 were normalized by putting source peak value to 1.

## 137 2.6. Classification

### 138 2.6.1. Sensor-level classification

139 A linear support vector machine (SVM; Cortes and Vapnik, 1995) imple-  
140 mented in the ScikitLearn package (Pedregosa et al., 2011) was applied for  
141 single-epoch classification of the conditions "Attended Left" vs. "Attended  
142 Right". To this end, the pre-processed MEG data (filtered to 0.1–30 Hz) were  
143 down-sampled by factor 8 to a sampling rate of 125 Hz. Amplitudes of the  
144 planar gradiometer channels were concatenated to form the feature vector.  
145 Five-fold cross-validation (CV) was applied with an 80/20 split; 80% of data  
146 were used for training and the rest for testing. The empirical chance level  
147 was around 55% for our sample size of 500 trials in this two-class decoding  
148 task (Combrisson and Jerbi, 2015).

149 Decoding was separately performed on data of 1) the entire epoch (250  
150 samples x 204 channels; *entire-epoch decoding*), 2) one time point (1 sample  
151 x 204 channels; *spatially-resolved decoding*), and 3) one channel (250 samples  
152 x 1 channel; *time-resolved decoding*).

153 *2.6.2. Source-level classification*

154 A linear SVM decoder with five-fold CV (80/20 split) was applied to the  
155 individual source estimates calculated for the conditions “Attended Left”  
156 and “Attended Right”. A spatial searchlight across the source space was  
157 used on the 2-s epochs and the resulting accuracy maps were morphed to the  
158 FreeSurfer average brain (comprising 20484 source points) and averaged. In  
159 addition, the accuracies obtained for the left and right auditory cortex were  
160 compared across the individuals using a paired t-test.

161 **3. Results**

162 *3.1. Behavioral data*

163 The average relative absolute error of the reported deviant count was 49%  
164 for the 10-% deviant probability ( $N = 5$ ; subjects S03–S07) and 12% for the  
165 5-% probability ( $N = 7$ ; subjects S09–S15).

| Subject | Score ( <i>mean</i> $\pm$ <i>SD</i> ; %) |
|---------|------------------------------------------|
| S01     | 90 $\pm$ 1                               |
| S02     | 95 $\pm$ 2                               |
| S03     | 97 $\pm$ 1                               |
| S04     | 92 $\pm$ 1                               |
| S05     | 99 $\pm$ 1                               |
| S06     | 84 $\pm$ 2                               |
| S07     | 87 $\pm$ 2                               |
| S08     | 96 $\pm$ 0                               |
| S09     | 91 $\pm$ 3                               |
| S10     | 94 $\pm$ 1                               |
| S11     | 96 $\pm$ 1                               |
| S12     | 97 $\pm$ 1                               |
| S13     | 90 $\pm$ 1                               |
| S14     | 99 $\pm$ 1                               |
| S15     | 84 $\pm$ 2                               |
| MEAN    | 93 $\pm$ 1                               |

Table 1: Entire-epoch classification accuracy for all subjects and the group mean accuracy.

166 *3.2. Sensor-level analysis*

167 Average evoked responses to each attention condition (“Attended Left”,  
168 “Unattended Left”, “Attended Right”, “Unattended Right”) are shown in  
169 Figures 2 and 3.

170 Time-resolved classification revealed that the most informative responses  
171 occurred in 100–400 ms after the stimulus onset (Figure 2 and 3). The  
172 average evoked responses for subject S03 (group) peaked at 185 ms (185  
173 ms), 236 ms (245 ms) and 309 ms (312 ms) for “Attended Left” attention  
174 condition. For the condition “Attended Right”, responses peaked at 193 ms  
175 (195 ms), 273 ms (304 ms) and 361 ms (390 ms). Both in Subject S03 and  
176 in the group, time-resolved classification peaked at 320 ms.

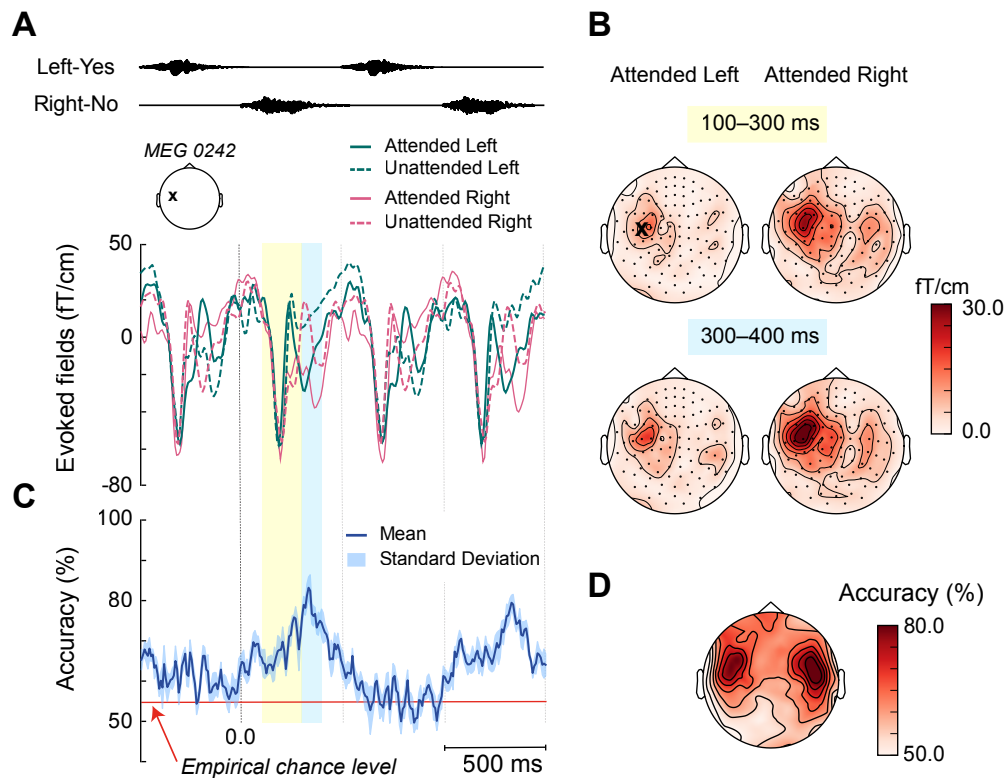

Figure 2: Evoked responses and classification accuracies in a representative subject (S03) to four consecutive stimuli. **A**: Acoustic waveforms of the stimuli and average responses at a planar gradiometer channel low-pass-filtered at 30 Hz in the attended (solid lines) and unattended (dashed lines) conditions. **B**: Spatial patterns (gradient strength maps) of the evoked responses. **C**: Time-resolved classification accuracies with standard deviation (blue shading) computed across the folds. **D**: Spatially-resolved classification accuracies.

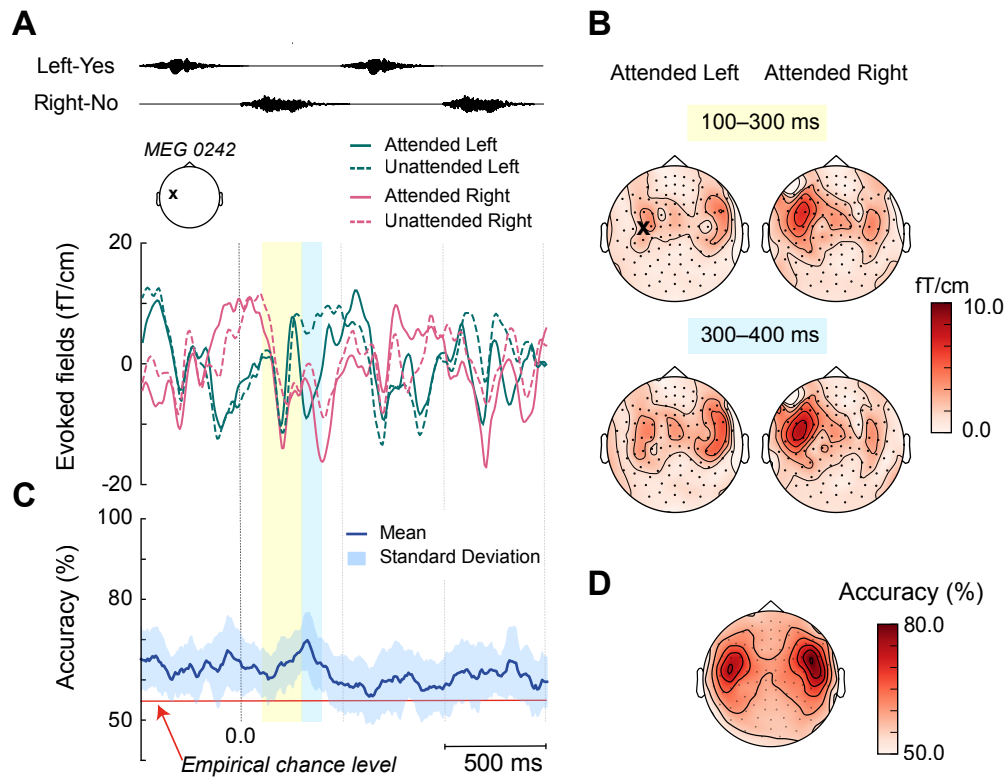

Figure 3: Evoked responses and classification accuracies at the group level ( $N = 15$ ). **A**: Acoustic waveforms of the stimuli and average responses at a planar gradiometer channel low-pass-filtered at 30 Hz in the attended (solid lines) and unattended (dashed lines) conditions. **B**: Spatial patterns (gradient strength maps) of the evoked responses. **C**: Time-resolved classification accuracies with standard deviation (blue shading) computed across the folds. **D**: Spatially-resolved classification accuracies.

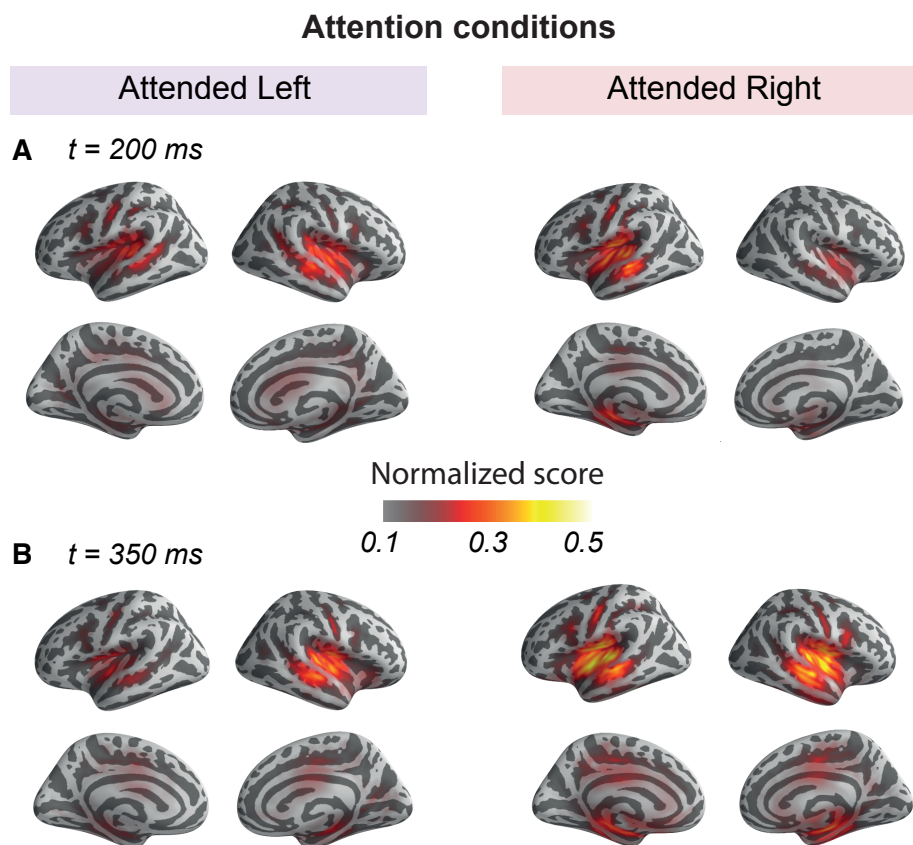

Figure 4: Source estimates of the evoked responses. Normalized group average ( $N = 12$ ). **A**: “Attended Left” and “Attended Right” at 200 ms after stimulus onset; **B**: “Attended Left” and “Attended Right” at 350 ms after stimulus onset .



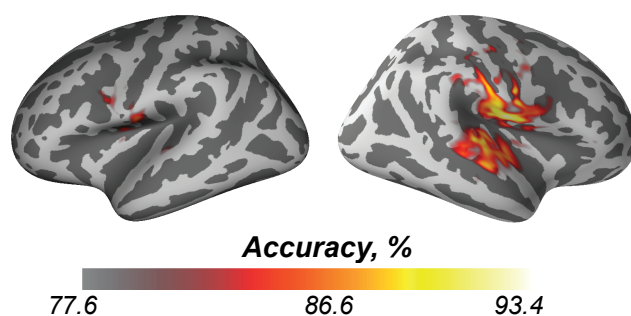

Figure 5: Source-level spatial-searchlight classification in a representative subject (S03) morphed to the average brain. Color indicates the accuracy of decoding "Attended Left" vs. "Attended Right" based on the signal from that cortical location; the top 5% of the scores in each hemisphere are shown.

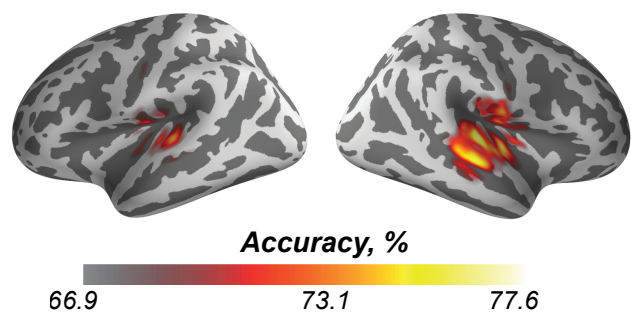

Figure 6: Source-level decoding at the group level ( $N = 12$ ). Color indicates the accuracy of classification of "Attended Left" vs. "Attended Right" based on the signal from that cortical location; the top 5% of the scores in each hemisphere are shown.

177 Spatially-resolved classification indicated that the most informative sig-  
178 nals arose from temporal regions. Both the temporal and spatial decoding  
179 patterns were qualitatively similar across the subjects; see Figure 2 for a  
180 representative subject and Figure 3 for the group result. Using the entire  
181 epochs for decoding “Attend Left” vs. “Attend Right” conditions yielded  
182 scores 84–99% (mean 93%; Table 1) across the 15 subjects.

### 183 3.3. Source-level analysis

184 Source modeling of the peaks of the evoked responses indicated sources  
185 in both auditory cortices. Paired t-tests showed significant source-amplitude  
186 differences ( $p < 0.05$ ) between the left and right hemisphere sources in the  
187 “Attended Left” condition but not in the “Attended Right” condition ( $p >$   
188  $0.05$ ;  $N = 12$ ). In addition, a paired t-test showed that in the “Attended  
189 Left” condition, the source amplitudes were significantly different from those  
190 in the “Attended Right” condition at 350 ms ( $p < 0.05$ ) (see Figure 6) while  
191 at 200 ms the difference was not significant.

192 Spatial-searchlight decoding applied in source space indicated that audi-  
193 tory cortices were the most informative about attention target; see Fig. 6.  
194 All subjects ( $N = 12$  with source estimates) showed the highest accuracy for  
195 source signals arising from the auditory cortices. The across-subjects average  
196 peak value was 74.0% in the left and 77.6% in the right temporal areas. This  
197 difference between the hemispheres was not significant ( $p = 0.389$ ,  $N = 12$ ).

## 198 4. Discussion

199 In this paper, we showed that the target of selective auditory attention  
200 to concurrent streams of naturalistic speech stimuli can be robustly detected  
201 from unaveraged MEG responses and that this detection is most accurate for  
202 signals arising from the auditory cortices 300–400 ms after stimulus onset.

203 In our data, the earliest clearly-discernible response peaks at about 200 ms  
204 after the onset of the spoken-word stimulus. This response – often referred to  
205 as N2 or N200 in EEG literature – shows only weak dependence on attention  
206 in our results. In contrast, the responses occurring within 300–400 ms are  
207 significantly modulated by attention. Several studies have shown that the  
208 late component of the P300 response is affected by attention (see e.g. [Chennu  
209 et al., 2013](#); [Picton, 1992](#)) and this component is likely the largest contributor  
210 to our classification results.

211 In general, an increased P300 amplitude can be due to unexpected changes  
212 in the stimulus sequence (e.g. in an auditory oddball task). As opposed to  
213 the mismatch negativity (MMN) response occurring earlier and indexing local  
214 deviants ([Näätänen et al., 2007](#)), the P300 appears to reflect mostly global,  
215 consciously-perceived changes in the stimulus stream, e.g. an unexpected  
216 stimulus sequence ([Bekinschtein et al., 2009](#)). These observations provide  
217 further evidence that the P300 response echoes cognitive processes, such as  
218 attention, that are closely linked to conscious perception.

219 To elicit brain responses with maximal attentional modulation but with  
220 minimal subject training, we employed meaningful stimuli that are easy to  
221 attend to even during dichotic listening. As pointed out by Hill and colleagues  
222 ([2014](#)), applying naturalistic stimuli as opposed to meaningless tone pips  
223 could make dichotic listening more pleasant and thus contribute to stronger  
224 attentional modulation of the responses and eventually to higher accuracy in  
225 classifying the target of attention.

226 Due to the above factors and the obtained high classification accuracy,  
227 our paradigm could be well-suited for a brain–computer interface (BCI).  
228 Several studies have exploited selective auditory attention and/or P300 re-  
229 sponses to drive a BCI but usually not with real spoken words. For ex-  
230 ample, Halder and colleagues ([2018](#)) used five Japanese Hiragana syllables  
231 (*/ka/*, */ki/*, */ku/*, */ke/*, and */ko/*) presented at different spatial locations  
232 in the auditory scene while measuring EEG, applied shrinkage Linear Dis-  
233 criminant Analysis (LDA) to classify the target of attention from the P300  
234 responses, and obtained classification accuracy of about 70%. Sugi and col-

235 leagues (2018) similarly employed spatially distinct sound sources (six in  
236 their case) and optimized the stimulus onset asynchrony for maximal infor-  
237 mation transfer rate; the optimal SOA was found to be 400–500 ms, which  
238 yielded over 85% accuracy when classifying the target sound source vs. all  
239 others. Heo and colleagues (2017) utilized piano and violin music, sounds  
240 of nature as well as pure tones which were all amplitude modulated at 38  
241 and 42 Hz to elicit auditory steady-state responses. LDA classification of the  
242 EEG responses to sounds of nature yielded the highest accuracy (83%), and  
243 the authors argue that this due to the acceptance, or pleasantness, of these  
244 stimuli compared to the other stimuli in that study.

245 The high classification accuracy we have now obtained offline does not  
246 readily indicate high online accuracy. In an online setting, the classifier can  
247 only be trained with samples from the beginning of the recording, which may  
248 lower the classification accuracy if the responses evolve in the course of the  
249 measurement session due to adaptation or change in the mental strategy to  
250 maintain attention in one stream. In addition, all the pre-processing that we  
251 now perform offline to improve data quality may not be available online due  
252 to computational reasons.

253 Individual differences in response latencies and spatial patterns on the  
254 MEG sensor array may limit across-subject generalization of trained clas-  
255 sifiers. Future studies could assess these differences and their impact on  
256 classification accuracy.

257 Our current results are based on MEG measurements. As a non-portable  
258 and expensive technology, MEG-based BCIs have limited applications be-  
259 yond neuroscientific experimentation. However, a MEG BCI could assist the  
260 development of an eventual EEG-based BCI that could be adopted widely.

261 Despite the current limitations above, our paradigm and classification  
262 approach holds promise for a future BCI. The use of stimuli that directly  
263 carry the semantics of the communication or control elements and an intuitive  
264 selection task make such a BCI easy to use and likely reduce the training time  
265 of both the subject and the classifier.

## 266 5. Conclusions

267 We have shown that the target of auditory attention to one of two con-  
268 current streams spoken words can be robustly decoded from single MEG re-  
269 sponses. Our result corroborates attentional modulation of auditory evoked  
270 responses also to naturalistic stimuli. The achieved high decoding accuracy  
271 could enable the use of our experimental paradigm and classification method  
272 in an efficient and intuitive brain–computer interface.

## 273 6. Acknowledgements

274 The measurements were conducted at the MEG Core of Aalto Neuroimag-  
275 ing, Aalto University, Finland. Measurements were financially supported by  
276 Aalto Brain Centre. Authors declare no conflicts of interest.

## 277 References

- 278 Astrand, E., Wardak, C., Ben Hamed, S., 2014. Selective visual attention to  
279 drive cognitive brain-machine interfaces: from concepts to neurofeedback  
280 and rehabilitation applications. *Front. Syst. Neurosci.* 8, 144. doi:[10.3389/fnsys.2014.00144](https://doi.org/10.3389/fnsys.2014.00144).  
281
- 282 Bekinschtein, T.A., Dehaene, S., Rohaut, B., Tadel, F., Cohen, L., Naccache,  
283 L., 2009. Neural signature of the conscious processing of auditory regular-  
284 ities. *Proc. Natl. Acad. Sci. U S A* 106, 1672–1677. doi:[10.1073/pnas.0809667106](https://doi.org/10.1073/pnas.0809667106).  
285
- 286 Chennu, S., Noreika, V., Gueorguiev, D., Blenkmann, A., Kochen, S., Ibáñez,  
287 A., Owen, A.M., Bekinschtein, T.A., 2013. Expectation and attention in  
288 hierarchical auditory prediction. *J. Neurosci.* 33, 11194–11205. doi:[10.1523/JNEUROSCI.0114-13.2013](https://doi.org/10.1523/JNEUROSCI.0114-13.2013).  
289
- 290 Cherry, E.C., 1953. Some experiments on the recognition of speech, with  
291 one and with two ears. *J. Acoust. Soc. Am.* 25, 975–979. doi:[10.1121/1.1907229](https://doi.org/10.1121/1.1907229).  
292
- 293 Combrisson, E., Jerbi, K., 2015. Exceeding chance level by chance: The  
294 caveat of theoretical chance levels in brain signal classification and statisti-  
295 cal assessment of decoding accuracy. *J. Neurosci. Methods* 250, 126–136.  
296 doi:[10.1016/j.jneumeth.2015.01.010](https://doi.org/10.1016/j.jneumeth.2015.01.010).

- 297 Cortes, C., Vapnik, V., 1995. Support-vector networks. *Mach. Learn.* 20,  
298 273–297. doi:[10.1023/A:1022627411411](https://doi.org/10.1023/A:1022627411411).
- 299 Curtin, A., Ayaz, H., Liu, Y., Shewokis, P.A., Onaral, B., 2012. A p300-based  
300 EEG-BCI for spatial navigation control. *Conf. Proc. IEEE Eng. Med. Biol.*  
301 *Soc.* 2012, 3841–3844. doi:[10.1109/EMBC.2012.6346805](https://doi.org/10.1109/EMBC.2012.6346805).
- 302 Dale, A.M., Fischl, B., Sereno, M.I., 1999. Cortical surface-based analysis. i.  
303 segmentation and surface reconstruction. *NeuroImage* 9, 179–194. doi:[10.](https://doi.org/10.1006/nimg.1998.0395)  
304 [1006/nimg.1998.0395](https://doi.org/10.1006/nimg.1998.0395).
- 305 Dale, A.M., Liu, A.K., Fischl, B.R., Buckner, R.L., Belliveau, J.W., Lewine,  
306 J.D., Halgren, E., 2000. Dynamic statistical parametric mapping: combin-  
307 ing fMRI and MEG for high-resolution imaging of cortical activity. *Neuron*  
308 26, 55–67. doi:[10.1016/S0896-6273\(00\)81138-1](https://doi.org/10.1016/S0896-6273(00)81138-1).
- 309 Fischl, B., Sereno, M.I., Dale, A.M., 1999. Cortical surface-based analysis. II:  
310 Inflation, flattening, and a surface-based coordinate system. *NeuroImage*  
311 9, 195–207. doi:[10.1006/nimg.1998.0396](https://doi.org/10.1006/nimg.1998.0396).
- 312 Furdea, A., Halder, S., Krusienski, D.J., Bross, D., Nijboer, F., Birbaumer,  
313 N., Kübler, A., 2009. An auditory oddball (p300) spelling system for  
314 brain-computer interfaces. *Psychophysiology* 46, 617–625. doi:[10.1111/](https://doi.org/10.1111/j.1469-8986.2008.00783.x)  
315 [j.1469-8986.2008.00783.x](https://doi.org/10.1111/j.1469-8986.2008.00783.x).
- 316 Geronimo, A., Kamrunnahar, M., Schiff, S.J., . Single trial predictors for  
317 gating motor-imagery brain-computer interfaces based on sensorimotor  
318 rhythm and visual evoked potentials. *Front. Neurosci.* 10. doi:[10.3389/](https://doi.org/10.3389/fnins.2016.00164)  
319 [fnins.2016.00164](https://doi.org/10.3389/fnins.2016.00164).
- 320 Gramfort, A., Luessi, M., Larson, E., Engemann, D.A., Strohmeier, D., Brod-  
321 beck, C., Parkkonen, L., Hämäläinen, M.S., 2014. Mne software for pro-  
322 cessing meg and eeg data. *NeuroImage* 86, 446 – 460.
- 323 Halder, S., Rea, M., Andreoni, R., Nijboer, F., Hammer, E.M., Kleih, S.C.,  
324 Birbaumer, N., Kübler, A., 2010. An auditory oddball brain-computer  
325 interface for binary choices. *Clin. Neurophysiol.* 121, 516–523. doi:[10.](https://doi.org/10.1016/j.clinph.2009.11.087)  
326 [1016/j.clinph.2009.11.087](https://doi.org/10.1016/j.clinph.2009.11.087).

- 327 Halder, S., Takano, K., Kansaku, K., 2018. Comparison of four control  
328 methods for a five-choice assistive technology. *Front. Hum. Neurosci.* 12,  
329 228. doi:[10.3389/fnhum.2018.00228](https://doi.org/10.3389/fnhum.2018.00228).
- 330 Halder, S., Takano, K., Ora, H., Onishi, A., Utsumi, K., Kansaku, K., 2016.  
331 An evaluation of training with an auditory p300 brain-computer interface  
332 for the japanese hiragana syllabary. *Front. Neurosci.* 10, 446. doi:[10.3389/  
333 fnins.2016.00446](https://doi.org/10.3389/fnins.2016.00446).
- 334 Heo, J., Baek, H.J., Hong, S., Chang, M.H., Lee, J.S., Park, K.S., 2017.  
335 Music and natural sounds in an auditory steady-state response based brain-  
336 computer interface to increase user acceptance. *Comput. Biol. Med.* 84,  
337 45–52. doi:[10.1016/j.compbimed.2017.03.011](https://doi.org/10.1016/j.compbimed.2017.03.011).
- 338 Hill, N.J., Moinuddin, A., Häuser, A.K., Kienzle, S., Schalk, G., 2012. Com-  
339 munication and control by listening: toward optimal design of a two-class  
340 auditory streaming brain-computer interface. *Front. Neurosci.* 6, 181.  
341 doi:[10.3389/fnins.2012.00181](https://doi.org/10.3389/fnins.2012.00181).
- 342 Hill, N.J., Ricci, E., Haider, S., McCane, L.M., Heckman, S., Wolpaw, J.R.,  
343 Vaughan, T.M., 2014. A practical, intuitive brain-computer interface for  
344 communicating 'yes' or 'no' by listening. *J. Neural. Eng.* 11, 035003.  
345 doi:[10.1088/1741-2560/11/3/035003](https://doi.org/10.1088/1741-2560/11/3/035003).
- 346 Hillyard, S.A., Hink, R.F., Schwent, V.L., Picton, T.W., 1973. Electrical  
347 signs of selective attention in the human brain. *Science* 182, 177–180.  
348 doi:[10.1126/science.182.4108.177](https://doi.org/10.1126/science.182.4108.177).
- 349 Höhne, J., Schreuder, M., Blankertz, B., Tangermann, M., 2011. A novel  
350 9-class auditory ERP paradigm driving a predictive text entry system.  
351 *Front. Neurosci.* 5, 99. doi:[10.3389/fnins.2011.00099](https://doi.org/10.3389/fnins.2011.00099).
- 352 Hübner, D., Schall, A., Prange, N., Tangermann, M., 2018. Eyes-closed in-  
353 creases the usability of brain-computer interfaces based on auditory event-  
354 related potentials. *Front. Hum. Neurosci.* 12, 391. doi:[10.3389/fnhum.  
355 2018.00391](https://doi.org/10.3389/fnhum.2018.00391).
- 356 Kaongoen, N., Jo, S., 2017. A novel hybrid auditory BCI paradigm combin-  
357 ing ASSR and p300. *J. Neurosci. Methods* 279, 44–51. doi:[10.1016/j.  
358 jneumeth.2017.01.011](https://doi.org/10.1016/j.jneumeth.2017.01.011).

- 359 Kidd, G.J., 2017. Enhancing auditory selective attention using a visually  
360 guided hearing aid. *J. Speech Lang. Hear. Res.* 60, 3027–3038. doi:[10.1044/2017\\_JSLHR-H-17-0071](https://doi.org/10.1044/2017_JSLHR-H-17-0071).  
361
- 362 Kim, D.W., Hwang, H.J., Lim, J.H., Lee, Y.H., Jung, K.Y., Im, C.H., 2011.  
363 Classification of selective attention to auditory stimuli: toward vision-free  
364 brain-computer interfacing. *J. Neurosci. Methods* 197, 180–185. doi:[10.1016/j.jneumeth.2011.02.007](https://doi.org/10.1016/j.jneumeth.2011.02.007).  
365
- 366 McCane, L.M., Heckman, S.M., McFarland, D.J., Townsend, G., Mak, J.N.,  
367 Sellers, E.W., Zeitlin, D., Tenteromano, L.M., Wolpaw, J.R., Vaughan,  
368 T.M., 2015. P300-based brain-computer interface (BCI) event-related po-  
369 tentials (ERPs): People with amyotrophic lateral sclerosis (ALS) vs. age-  
370 matched controls. *Clin. Neurophysiol.* 126, 2124–2131. doi:[10.1016/j.clinph.2015.01.013](https://doi.org/10.1016/j.clinph.2015.01.013).  
371
- 372 Nambu, I., Ebisawa, M., Kogure, M., Yano, S., Hokari, H., Wada, Y., 2013.  
373 Estimating the intended sound direction of the user: Toward an auditory  
374 brain-computer interface using out-of-head sound localization. *PLoS ONE*  
375 8, e57174. doi:[10.1371/journal.pone.0057174](https://doi.org/10.1371/journal.pone.0057174).
- 376 Nijboer, F., Furdea, A., Gunst, I., Mellinger, J., McFarland, D.J., Birbaumer,  
377 N., Kübler, A., 2008. An auditory brain-computer interface (BCI). *J.*  
378 *Neurosci. Methods* 167, 43–50. doi:[10.1016/j.jneumeth.2007.02.009](https://doi.org/10.1016/j.jneumeth.2007.02.009).
- 379 Näätänen, R., Paavilainen, P., Rinne, T., Alho, K., 2007. The mismatch  
380 negativity (MMN) in basic research of central auditory processing: a re-  
381 view. *Clin. Neurophysiol.* 118, 2544–2590. doi:[10.1016/j.clinph.2007.04.026](https://doi.org/10.1016/j.clinph.2007.04.026).  
382
- 383 Pedregosa, F., Varoquaux, G., Gramfort, A., Michel, V., Thirion, B., Grisel,  
384 O., Blondel, M., Prettenhofer, P., Weiss, R., Dubourg, V., Vanderplas,  
385 J., Passos, A., Cournapeau, D., Brucher, M., Perrot, M., Duchesnay, É.,  
386 2011. Scikit-learn: Machine learning in python. *J. Mach. Learn. Res.* 12,  
387 2825–2830.
- 388 Peirce, J.W., 2007. PsychoPy—psychophysics software in python. *J. Neurosci.*  
389 *Methods* 162, 8–13. doi:[10.1016/j.jneumeth.2006.11.017](https://doi.org/10.1016/j.jneumeth.2006.11.017).
- 390 Peirce, J.W., 2008. Generating stimuli for neuroscience using PsychoPy.  
391 *Front. Neuroinform.* 2, 10. doi:[10.3389/neuro.11.010.2008](https://doi.org/10.3389/neuro.11.010.2008).



- 392 Picton, T.W., 1992. The p300 wave of the human event-  
393 related potential. *Clin. Neurophysiol.* 9, 456–479. doi:[10.1097/  
394 00004691-199210000-00002](https://doi.org/10.1097/00004691-199210000-00002).
- 395 Schreuder, M., Blankertz, B., Tangermann, M., 2010. A new auditory multi-  
396 class brain-computer interface paradigm: Spatial hearing as an informative  
397 cue. *PLoS ONE* 5, e9813. doi:[10.1371/journal.pone.0009813](https://doi.org/10.1371/journal.pone.0009813).
- 398 Sellers, E.W., Donchin, E., 2006. A p300-based brain-computer interface:  
399 Initial tests by ALS patients. *Clin. Neurophysiol.* 117, 538–548. doi:[10.  
400 1016/j.clinph.2005.06.027](https://doi.org/10.1016/j.clinph.2005.06.027).
- 401 Sugi, M., Hagimoto, Y., Nambu, I., Gonzalez, A., Takei, Y., Yano, S., Hokari,  
402 H., Wada, Y., 2018. Improving the performance of an auditory brain-  
403 computer interface using virtual sound sources by shortening stimulus on-  
404 set asynchrony. *Front. Neurosci.* 12, 108. doi:[10.3389/fnins.2018.00108](https://doi.org/10.3389/fnins.2018.00108).
- 405 Taulu, S., Hari, R., 2009. Removal of magnetoencephalographic artifacts  
406 with temporal signal-space separation: demonstration with single-trial  
407 auditory-evoked responses. *Hum. Brain Mapp.* 30, 1524–1534. doi:[10.  
408 1002/hbm.20627](https://doi.org/10.1002/hbm.20627).
- 409 Woldorff, M., Gallen, C., Hampson, S., Hillyard, S., Pantev, C., Sobel, D.,  
410 Bloom, F., 1993. Modulation of early sensory processing in human auditory  
411 cortex during auditory selective attention. *Proc. Natl. Acad. Sci. U S A*  
412 90, 8722–8726. doi:[10.1073/pnas.90.18.8722](https://doi.org/10.1073/pnas.90.18.8722).
- 413 Yeom, S.K., Fazli, S., Müller, K.R., Lee, S.W., 2014. An efficient ERP-  
414 based brain-computer interface using random set presentation and face  
415 familiarity. *PLoS ONE* 9, e111157. doi:[10.1371/journal.pone.0111157](https://doi.org/10.1371/journal.pone.0111157).
